# Supplementary material
Source: PubMed Central journal article supplement (PMC5764793)

**Supplementary Table 1.** Comparison of Biomarkers of Renal Function During Follow-Up According to Development of End-Stage Renal Disease

| <b>Comparison of Biomarkers in those that develop ESRD vs. Not</b> |                                                     |                             |                             |                                       |                                                 |                 |                    |
|--------------------------------------------------------------------|-----------------------------------------------------|-----------------------------|-----------------------------|---------------------------------------|-------------------------------------------------|-----------------|--------------------|
| <b>Biomarker</b>                                                   | <b>Time Prior to ESRD/Modified End of Follow-up</b> |                             |                             |                                       |                                                 | <b>P-values</b> |                    |
|                                                                    | <b>3 years</b>                                      | <b>2 years</b>              | <b>1 year</b>               | <b>Time of ESRD/mEnd of Follow-up</b> | <b>Estimated Time of Divergence<sup>a</sup></b> | <b>Equality</b> | <b>Interaction</b> |
|                                                                    | <b>Placebo Group</b>                                |                             |                             |                                       |                                                 |                 |                    |
|                                                                    | ESRD vs. not (P-difference)                         | ESRD vs. not (P-difference) | ESRD vs. not (P-difference) | ESRD vs. not (P-difference)           |                                                 |                 |                    |
| <b>Creatinine (mg/dL)<sup>b</sup></b>                              | 2.0 vs 1.7;<br>p<0.001                              | 2.4 vs 1.8;<br>p<0.001      | 2.8 vs 1.9;<br>p<0.001      | 4.3 vs 1.9;<br>p<0.001                | >3 years                                        | <0.001          | <0.001             |
| <b>eGFR (mL/min/1.73m<sup>2</sup>)</b>                             | 33.5 vs 38.2;<br>p<0.001                            | 28.1 vs 36.7;<br>p<0.001    | 23.3 vs 35.4;<br>p<0.001    | 15.6 vs 34.9;<br>p<0.001              | >3 years                                        | <0.001          | <0.001             |
| <b>Urine Protein/Creatinine Ratio<sup>b</sup></b>                  | 1.4 vs 0.4;<br>p<0.001                              | 1.7 vs 0.4;<br>p<0.001      | 2.1 vs 0.4;<br>p<0.001      | 2.5 vs 0.5;<br>p<0.001                | >3 years                                        | <0.001          | <0.001             |
|                                                                    | <b>Darbepoetin Group</b>                            |                             |                             |                                       |                                                 |                 |                    |
|                                                                    | ESRD vs. not (P-difference)                         | ESRD vs. not (P-difference) | ESRD vs. not (P-difference) | ESRD vs. not (P-difference)           |                                                 |                 |                    |
| <b>Creatinine (mg/dL)<sup>b</sup></b>                              | 2.0 vs 1.7;<br>p<0.001                              | 2.3 vs 1.8;<br>p<0.001      | 2.7 vs 1.8;<br>p<0.001      | 4.6 vs 1.9;<br>p<0.001                | >3 years                                        | <0.001          | <0.001             |
| <b>eGFR (mL/min/1.73m<sup>2</sup>)</b>                             | 32.5 vs 38.2;<br>p<0.001                            | 28.6 vs 37.7;<br>p<0.001    | 24.1 vs 37.0;<br>p<0.001    | 14.7 vs 35.9;<br>p<0.001              | >3 years                                        | <0.001          | <0.001             |
| <b>Urine Protein/Creatinine Ratio<sup>b</sup></b>                  | 1.7 vs 0.4;<br>p<0.001                              | 2.1 vs 0.4;<br>p<0.001      | 2.7 vs 0.4;<br>p<0.001      | 3.1 vs 0.5;<br>p<0.001                | >3 years                                        | <0.001          | <0.001             |

P for Equality tests the null hypothesis that the curves are superimposable; P for Interaction tests the null hypothesis that the curves are parallel.

<sup>a</sup> Estimated time of divergence of biomarkers of interest (developed ESRD vs. not) was defined as the latest time at which the difference in point estimates became significant at  $\alpha=0.01$ .

<sup>b</sup> Groups are summarized and compared using geometric means  
eGFR, estimated glomerular filtration rate

**Supplementary Table 2.** Comparison of Biomarkers During Follow-Up According to Development of End-Stage Renal Disease Using a Refined Non-ESRD Comparator Group

| <b>Comparison of Biomarkers in those who develop ESRD (n=668) vs. Propensity Score Matched Sample of Non-ESRD (n=670)</b> |                                                     |                             |                             |                                       |                 |                    |
|---------------------------------------------------------------------------------------------------------------------------|-----------------------------------------------------|-----------------------------|-----------------------------|---------------------------------------|-----------------|--------------------|
| <b>Biomarker</b>                                                                                                          | <b>Time Prior to ESRD/Modified End of Follow-up</b> |                             |                             |                                       | <b>P-values</b> |                    |
|                                                                                                                           | <b>3 years</b>                                      | <b>2 years</b>              | <b>1 year</b>               | <b>Time of ESRD/mEnd of Follow-up</b> | <b>Equality</b> | <b>Interaction</b> |
|                                                                                                                           | <b>Placebo Group</b>                                |                             |                             |                                       |                 |                    |
|                                                                                                                           | ESRD vs. not (P-difference)                         | ESRD vs. not (P-difference) | ESRD vs. not (P-difference) | ESRD vs. not (P-difference)           |                 |                    |
| <b>Hemoglobin (g/dL)</b>                                                                                                  | 10.4 vs 10.1;<br>p<0.001                            | 10.3 vs 10.2;<br>p=0.36     | 10.2 vs 10.4;<br>p=0.005    | 9.5 vs 10.4;<br>p<0.001               | <0.001          | <0.001             |
| <b>Darbepoetin (Mean Dose in mcg/month)</b>                                                                               | 1.3 vs 6.0;<br>p=0.009                              | 3.2 vs 5.9;<br>p=0.037      | 7.4 vs 6.7;<br>p=0.54       | 18.5 vs 8.0;<br>p<0.001               | <0.001          | <0.001             |
| <b>Darbepoetin Dose Difference ([ESRD – non-ESRD] in mcg/month)</b>                                                       | -4.8                                                | -2.7                        | +0.7                        | +10.5                                 | <0.001          | <0.001             |
| <b>Ferritin (mcg/L)<sup>b</sup></b>                                                                                       | 147 vs 144;<br>p=0.81                               | 148 vs 143;<br>p=0.52       | 172 vs 151;<br>p=0.047      | 204 vs 169;<br>p=0.013                | 0.002           | 0.004              |
| <b>Transferrin Saturation (%)</b>                                                                                         | 24.9 vs 25.7;<br>p=0.44                             | 24.5 vs 25.6;<br>p=0.14     | 26.1 vs 25.8;<br>p=0.74     | 24.3 vs 26.1;<br>p=0.036              | 0.14            | 0.10               |
| <b>CRP (mg/L)<sup>b, c</sup></b>                                                                                          | 3.7 vs 2.7;<br>p=0.030                              | 3.9 vs 2.9;<br>p=0.001      | 3.9 vs 3.4;<br>p=0.057      | 5.8 vs 3.3;<br>p<0.001                | <0.001          | 0.028              |
|                                                                                                                           | <b>Darbepoetin Group</b>                            |                             |                             |                                       |                 |                    |
|                                                                                                                           | ESRD vs. not (P-difference)                         | ESRD vs. not (P-difference) | ESRD vs. not (P-difference) | ESRD vs. not (P-difference)           |                 |                    |
| <b>Hemoglobin (g/dL)</b>                                                                                                  | 11.2 vs 11.1;<br>p=0.16                             | 11.7 vs 11.6;<br>p=0.76     | 11.9 vs 11.9;<br>p=0.27     | 11.5 vs 12.4;<br>p<0.001              | <0.001          | <0.001             |
| <b>Darbepoetin (Mean Dose in mcg/month)</b>                                                                               | 131 vs 153;<br>p=0.010                              | 138 vs 146;<br>p=0.28       | 162 vs 167;<br>p=0.48       | 232 vs 197;<br>p<0.001                | <0.001          | <0.001             |

|                                                                         |                         |                         |                         |                          |        |        |
|-------------------------------------------------------------------------|-------------------------|-------------------------|-------------------------|--------------------------|--------|--------|
| <b>Darbepoetin Dose Difference<br/>([ESRD – non-ESRD] in mcg/month)</b> | -23                     | -8                      | -5                      | +36                      | <0.001 | <0.001 |
| <b>Ferritin (mcg/L)<sup>b</sup></b>                                     | 92 vs 107;<br>p=0.10    | 119 vs 120;<br>p=0.90   | 151 vs 144;<br>p=0.46   | 179 vs 183;<br>p=0.75    | 0.09   | 0.047  |
| <b>Transferrin Saturation (%)</b>                                       | 22.0 vs 21.6;<br>p=0.73 | 25.6 vs 27.2;<br>p=0.12 | 29.8 vs 29.4;<br>p=0.62 | 29.5 vs 34.0;<br>p<0.001 | <0.001 | <0.001 |
| <b>CRP (mg/L)<sup>b, c</sup></b>                                        | 2.9 vs 3.7;<br>p=0.08   | 3.5 vs 3.4;<br>p=0.80   | 3.6 vs 4.0;<br>p=0.22   | 5.3 vs 3.7;<br>p=0.002   | 0.002  | <0.001 |

**Supplementary Figure 1. TREAT Study Darbepoetin Management Protocol**

**Darbepoetin alfa Dosing Algorithm**

| Hb (g/dL)     | Hb rate of rise (g/dL/2 weeks) | Dose Adjustment                                                                                  |
|---------------|--------------------------------|--------------------------------------------------------------------------------------------------|
| < 12.5        | < 0.5                          | Increase to next higher dose                                                                     |
|               | ≥ 0.5 - < 1.0                  | Maintain dose                                                                                    |
|               | ≥ 1.0                          | Decrease to next lower dose                                                                      |
| 12.5 - < 13.5 | < 0.5                          | Maintain dose                                                                                    |
|               | ≥ 0.5 - < 1.0                  | Maintain dose                                                                                    |
|               | ≥ 1.0                          | Decrease to next lower dose                                                                      |
| 13.5-14.0     | Any                            | Decrease to next lower dose                                                                      |
| > 14.0        | Any                            | Administer placebo until Hb value is below 13.0, then resume darbepoetin alfa at next lower dose |

**Rescue Therapy Dosing Algorithm**

| Hb (g/dL) | Hb rate of rise (g/dL/2 weeks) | Dose Adjustment                          |
|-----------|--------------------------------|------------------------------------------|
| < 9.0     | < 0.5                          | Initiate or increase to next higher dose |
| < 9.0     | ≥ 0.5, but < 1.0               | Maintain dose                            |
| < 9.0     | ≥ 1.0                          | Decrease to next lower dose              |
| ≥ 9.0     | Any                            | Resume placebo administration            |

## Supplementary Figure 2. TREAT Study Iron Management Protocol

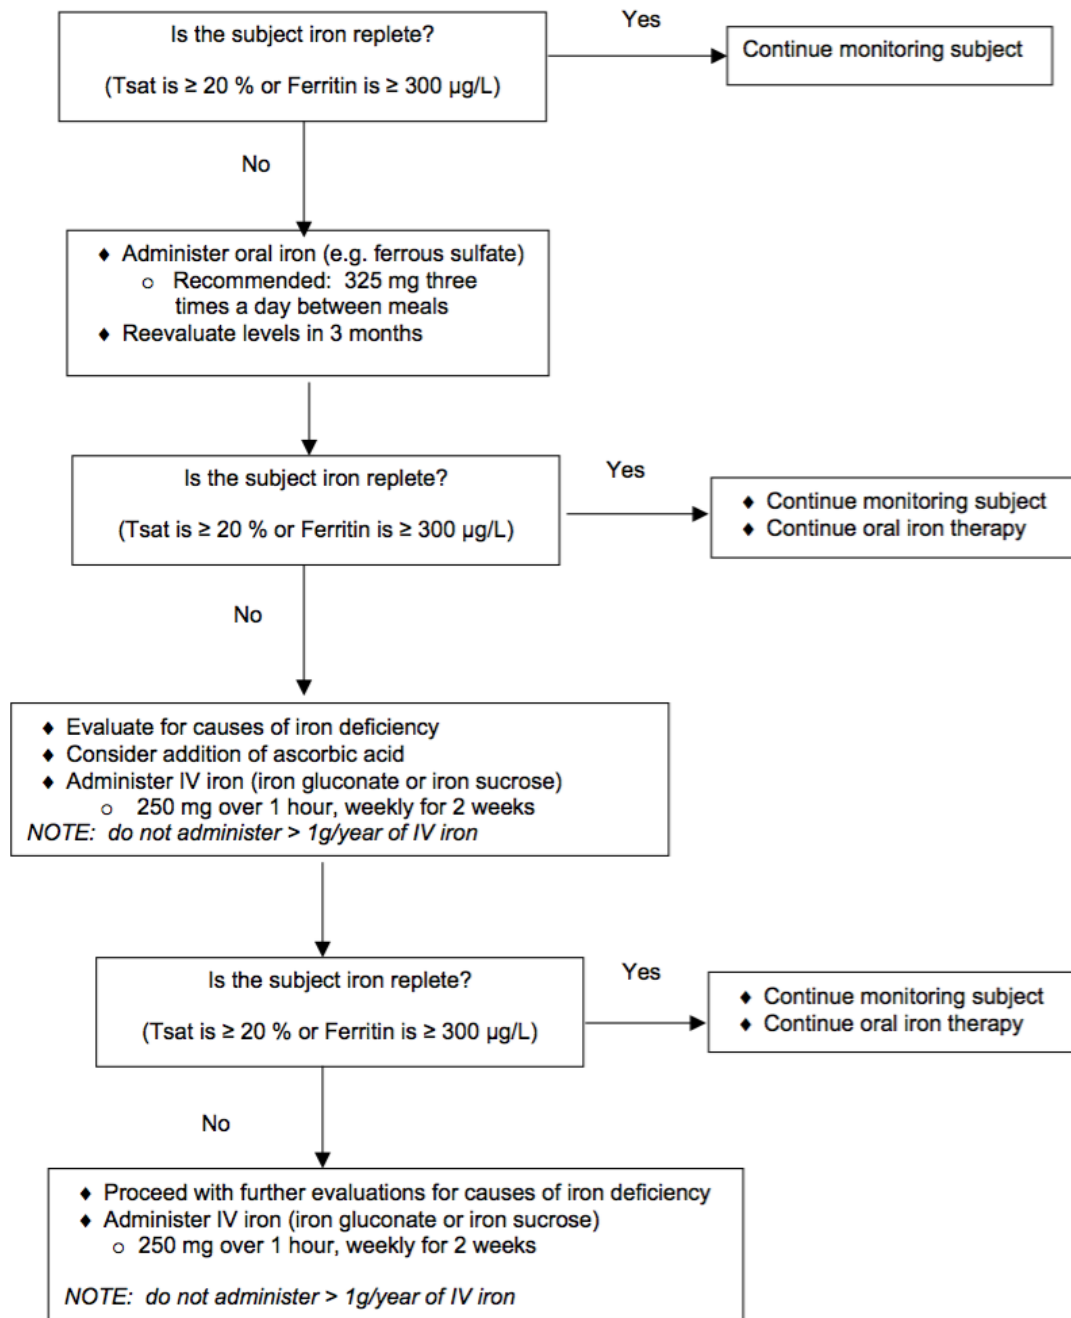

**Supplementary Figure 3.** Trajectory of Hemoglobin According to Development of ESRD in Subgroups of Participants With and Without Baseline ACEi/ARB Use

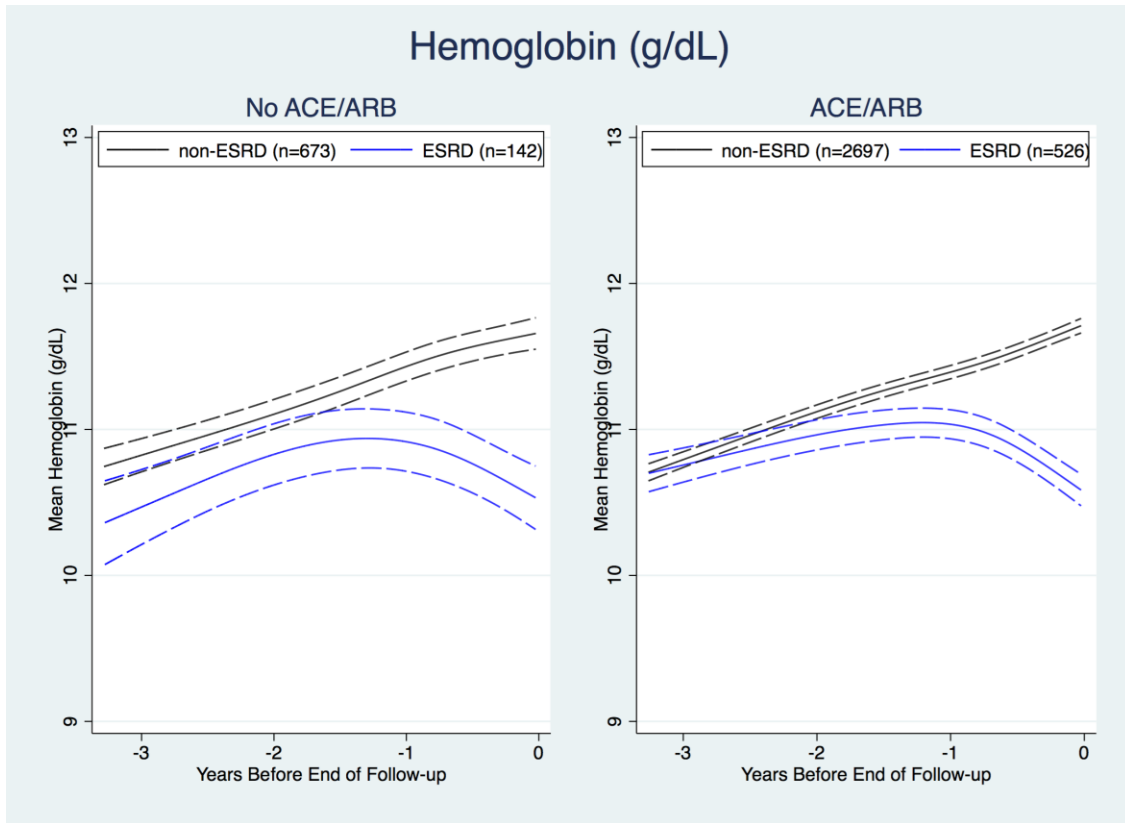

**Supplementary Figure 4.** Trajectory of Serum Creatinine According to Development of ESRD

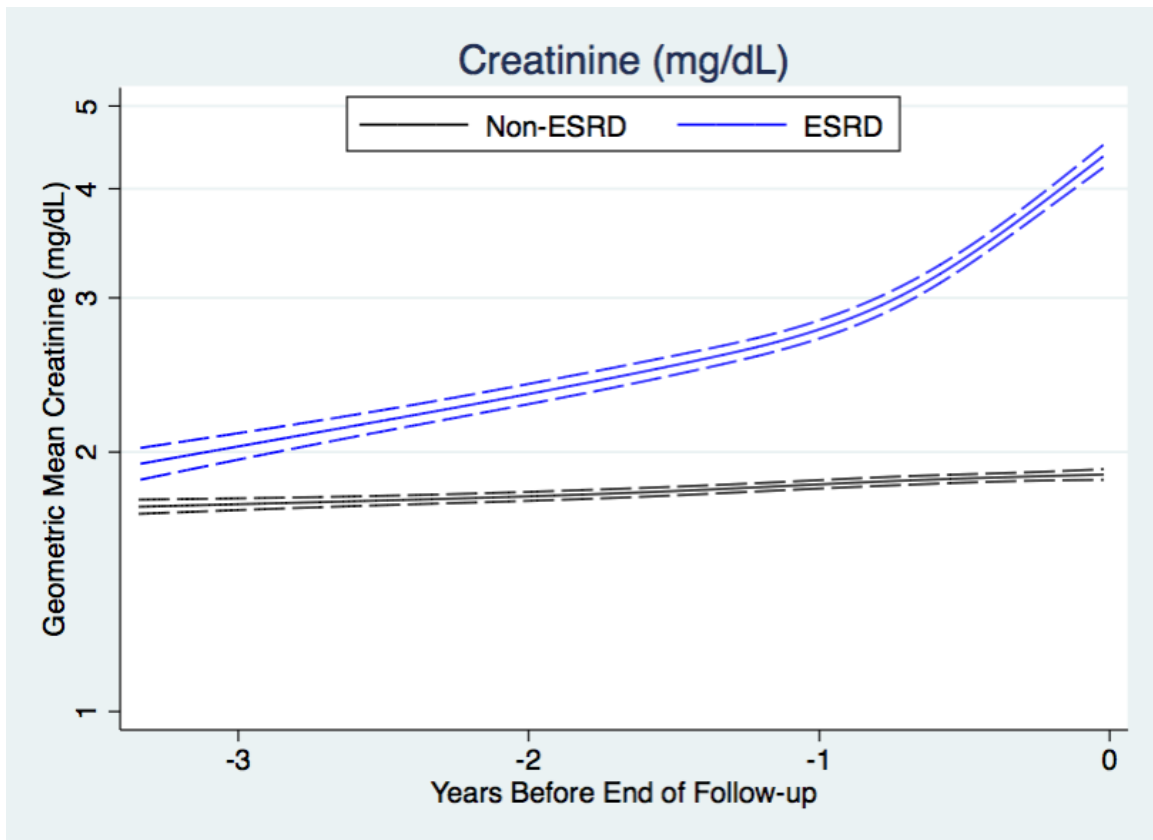

Supplementary Figure 5. Trajectory of Estimated Glomerular Filtration Rate According to Development of ESRD

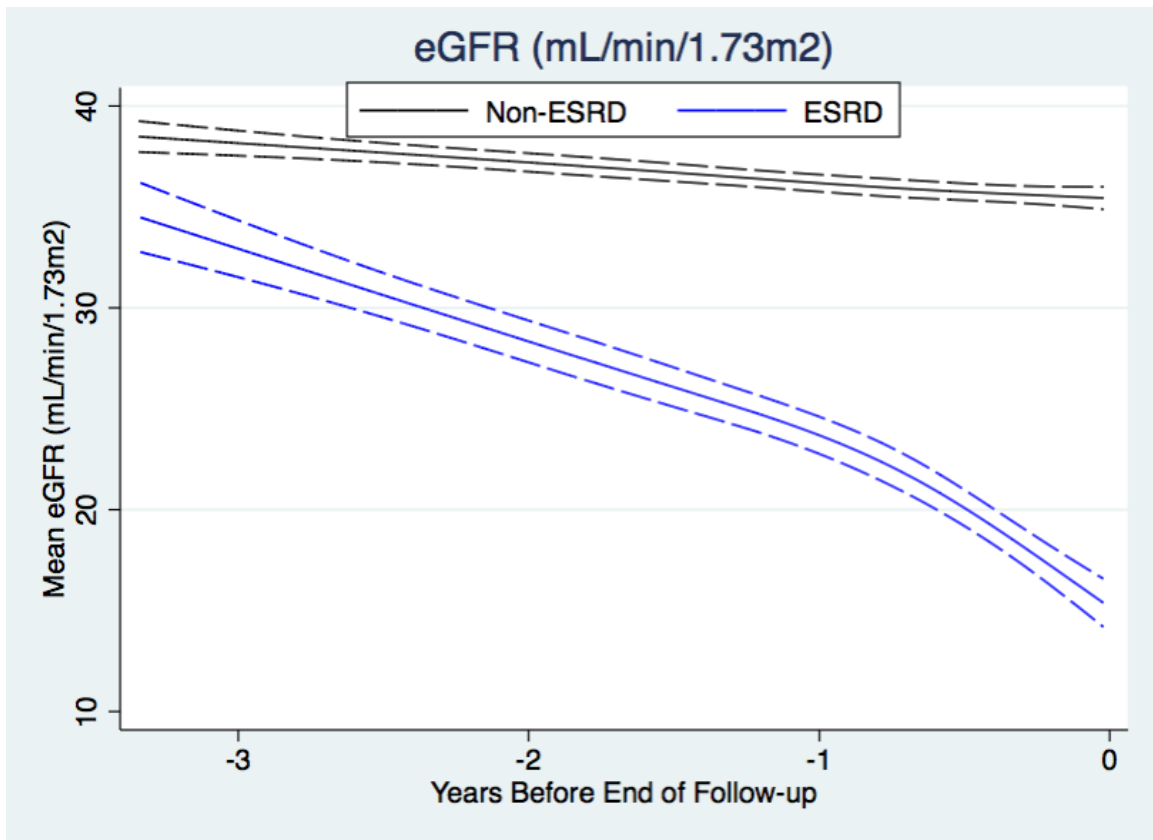

Supplement: NIHMS920870-supplement-supplement_1.pdf [file NIHMS920870-supplement-supplement_1.pdf]
